# Supplementary material for: A ratiometric fluorescent sensor made of a terbium coordination polymer for the anthrax biomarker 2,6-dipicolinic acid with on-site detection assisted by a smartphone app
Source: Royal Society of Chemistry journal article supplement (doi:10.1039/d1ce01256h), 2021-11-09
Supplement: d1ce01256h1.pdf [file d1ce01256h1.pdf]

# A ratiometric fluorescent sensor of a terbium coordination polymer for the anthrax biomarker 2,6-dipicolinic acid with on-site detection assisted by smartphone APP

Miao-Miao Qiu,<sup>a</sup> Ke-Fu Chen,<sup>b</sup> Qi-Rui Liu,<sup>a</sup> Wei-Ni Miao,<sup>c</sup> Bing Liu,<sup>a\*</sup> and Ling Xu<sup>c\*</sup>

<sup>a</sup> College of Chemistry and Chemical Engineering, Shaanxi Key Laboratory of Chemical Additives for Industry, Shaanxi University of Science and Technology, Xi'an 710021, Shaanxi Province, P. R. China

E-mail: liubing@sust.edu.cn

<sup>b</sup> College of Information Engineering, Henan University of Science and Technology, Luoyang 471000, Henan Province, P. R. China.

<sup>c</sup> Key Laboratory of Macromolecular Science of Shaanxi Province, Shaanxi Key Laboratory for Advanced Energy Devices, Shaanxi Engineering Laboratory for Advanced Energy Technology, School of Chemistry & Chemical Engineering, Shaanxi Normal University, Xi'an 710062, Shaanxi Province, P. R. China

**Table S1.** The structural determination and refinement data for Tb-NDBC.

|                                                                     |                                                                              |
|---------------------------------------------------------------------|------------------------------------------------------------------------------|
| Empirical formula                                                   | C <sub>13</sub> H <sub>6</sub> O <sub>6</sub> Tb                             |
| Color and Habit                                                     | Colorless platelet                                                           |
| Crystal Size (mm <sup>3</sup> )                                     | 0.22 × 0.16 × 0.05                                                           |
| Crystal system                                                      | monoclinic                                                                   |
| Space group                                                         | P2 <sub>1</sub> /c                                                           |
| <i>a</i> (Å)                                                        | 12.9504(7)                                                                   |
| <i>b</i> (Å)                                                        | 12.8021(6)                                                                   |
| <i>c</i> (Å)                                                        | 6.8288(4)                                                                    |
| <i>α</i> /°                                                         | 90                                                                           |
| <i>β</i> /°                                                         | 94.149(5)                                                                    |
| <i>γ</i> /°                                                         | 90                                                                           |
| <i>V</i> /Å <sup>3</sup>                                            | 1129.20(10)                                                                  |
| <i>Z</i>                                                            | 4                                                                            |
| <i>F</i> <sub>w</sub>                                               | 417.10                                                                       |
| <i>D</i> <sub>calcd</sub> (Mgm <sup>-3</sup> )                      | 2.453                                                                        |
| <i>μ</i> (mm <sup>-1</sup> )                                        | 31.065                                                                       |
| <i>F</i> (000)                                                      | 788.0                                                                        |
| 2 <i>θ</i> (°)                                                      | 19.026 to 133.186                                                            |
| Reflections measured                                                | 3782                                                                         |
| Independent reflections                                             | 1983 [ <i>R</i> <sub>int</sub> = 0.0346, <i>R</i> <sub>sigma</sub> = 0.0433] |
| <i>S</i>                                                            | 1.064                                                                        |
| Final <i>R</i> <sub>1</sub> , <i>wR</i> <sub>2</sub> indices (obs.) | <i>R</i> <sub>1</sub> = 0.0456, <i>wR</i> <sub>2</sub> = 0.1188              |
| <i>R</i> <sub>1</sub> , <i>wR</i> <sub>2</sub> indices (all)        | <i>R</i> <sub>1</sub> = 0.0525, <i>wR</i> <sub>2</sub> = 0.1250              |

$$R_1 = (\sum ||F_o| - |F_c|| / \sum |F_o|), wR_2 = [\sum (w(F_o^2 - F_c^2)^2) / \sum (w |F_o|^2)]^{1/2}$$

**Table S2.** Selected bond distances (Å) and bond angles (°) of Tb-NDBC.

| bond distances                  |                               |
|---------------------------------|-------------------------------|
| Tb1-Tb1 <sup>1</sup> =3.9549(7) | Tb1-O1=2.456(5)               |
| Tb1-O11=2.304(5)                | Tb1-O1 <sup>4</sup> =2.572(5) |
| Tb1-O12 <sup>1</sup> =2.325(6)  | Tb1-O2 <sup>5</sup> =2.371(5) |

|                                                    |                                                    |
|----------------------------------------------------|----------------------------------------------------|
| Tb1-O13 <sup>2</sup> =2.316(5)                     | Tb1-O2 <sup>4</sup> =2.568(5)                      |
| Tb1-O14 <sup>3</sup> =2.260(5)                     |                                                    |
| bond angles                                        |                                                    |
| O11-Tb1-Tb1 <sup>1</sup> =67.10(13)                | O11-Tb1-O12 <sup>1</sup> =136.15(19)               |
| O11-Tb1-O13 <sup>2</sup> =76.77(19)                | O11-Tb1-O1 <sup>3</sup> =82.20(19)                 |
| O11-Tb1-O1=152.11(18)                              | O11-Tb1-O2 <sup>4</sup> =72.06(19)                 |
| O11-Tb1-O2 <sup>3</sup> =71.64(19)                 | O12 <sup>1</sup> -Tb1-Tb1 <sup>1</sup> =69.10(13)  |
| O12 <sup>1</sup> -Tb1-O1 <sup>3</sup> =92.2(2)     | O12 <sup>1</sup> -Tb1-O1=70.69(18)                 |
| O12 <sup>1</sup> -Tb1-O2 <sup>4</sup> =75.3(2)     | O12 <sup>1</sup> -Tb1-O2 <sup>3</sup> =71.6(2)     |
| O13 <sup>2</sup> -Tb1-Tb1 <sup>1</sup> =142.45(14) | O13 <sup>2</sup> -Tb1-O12 <sup>1</sup> =145.22(19) |
| O13 <sup>2</sup> -Tb1-O1 <sup>3</sup> =80.14(18)   | O13 <sup>2</sup> -Tb1-O1=75.46(19)                 |
| O13 <sup>2</sup> -Tb1-O2 <sup>3</sup> =123.30(19)  | O13 <sup>2</sup> -Tb1-O2 <sup>4</sup> =136.71(19)  |
| O14 <sup>5</sup> -Tb1-Tb1 <sup>1</sup> =117.18(13) | O14 <sup>5</sup> -Tb1-O11=101.14(19)               |
| O14 <sup>5</sup> -Tb1-O12 <sup>1</sup> =100.2(2)   | O14 <sup>5</sup> -Tb1-O13 <sup>2</sup> =78.74(19)  |
| O14 <sup>5</sup> -Tb1-O1 <sup>3</sup> =157.20(17)  | O14 <sup>5</sup> -Tb1-O1=75.98(18)                 |
| O14 <sup>5</sup> -Tb1-O2 <sup>3</sup> =152.28(17)  | O14 <sup>5</sup> -Tb1-O2 <sup>4</sup> =78.64(18)   |
| O1 <sup>3</sup> -Tb1-Tb1 <sup>1</sup> =85.06(11)   | O1-Tb1-Tb1 <sup>1</sup> =139.30(13)                |
| O1-Tb1-O1 <sup>3</sup> =90.48(10)                  | O1 <sup>3</sup> -Tb1-O2 <sup>3</sup> =50.23(17)    |
| O1-Tb1-O2 <sup>3</sup> =122.92(17)                 | O2 <sup>3</sup> -Tb1-Tb1 <sup>1</sup> =35.12(12)   |
| O2 <sup>4</sup> -Tb1-Tb1 <sup>1</sup> =38.54(13)   | O24-Tb1-C13=98.24(19)                              |
| O24-Tb1-O13=123.31(17)                             | O24-Tb1-O1=132.52(18)                              |
| O24-Tb1-O23=73.7(2)                                |                                                    |

Symmetry codes for bond distances: <sup>1</sup> 1-x, 1-y, -z; <sup>2</sup> -x, 1/2+y, -1/2-z; <sup>3</sup> -x, 1-y, -z; <sup>4</sup> x, 3/2-y, -1/2+z; <sup>5</sup> 1-x, -1/2+y, 1/2-z; For bond angles: 1-x, 1-y, -z; <sup>2</sup> -x, 1/2+y, -1/2-z; <sup>3</sup> x, 3/2-y, -1/2+z; <sup>4</sup> 1-x, -1/2+y, 1/2-z; <sup>5</sup> -x, 1-y, -z; <sup>6</sup> -x, -1/2+y, -1/2-z; <sup>7</sup> x, 3/2-y, 1/2+z; <sup>8</sup> 1-x, 1/2+y, 1/2-z.

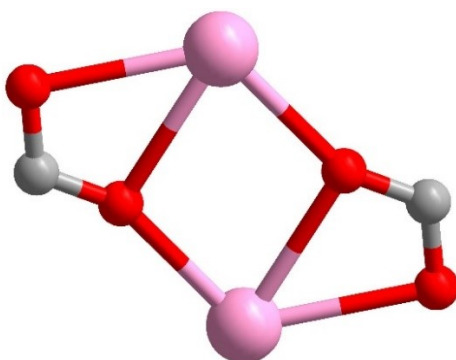

**Fig. S1.** The structural motif of Tb<sub>2</sub>(COO)<sub>2</sub> subunit.

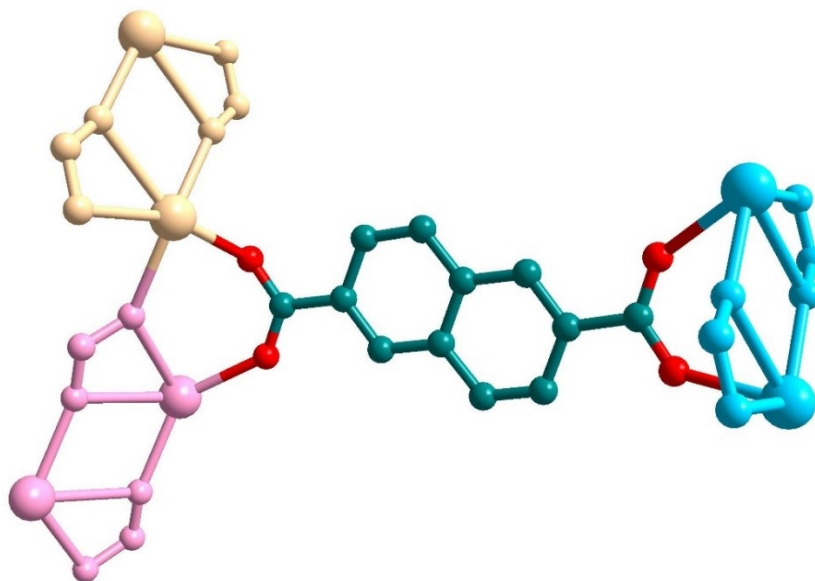

**Fig. S2.** The linkage mode of NDBC<sup>2-</sup> ligand with three Tb<sub>2</sub>(COO)<sub>2</sub> subunits.

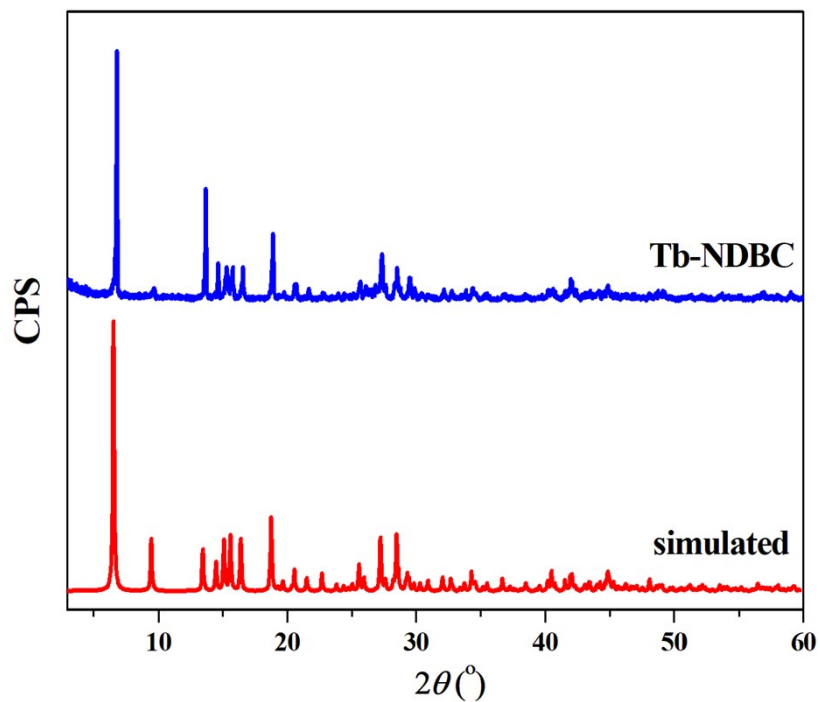

**Fig. S3.** Experimental PXRD pattern of Tb-NDBC compared to the simulated one.

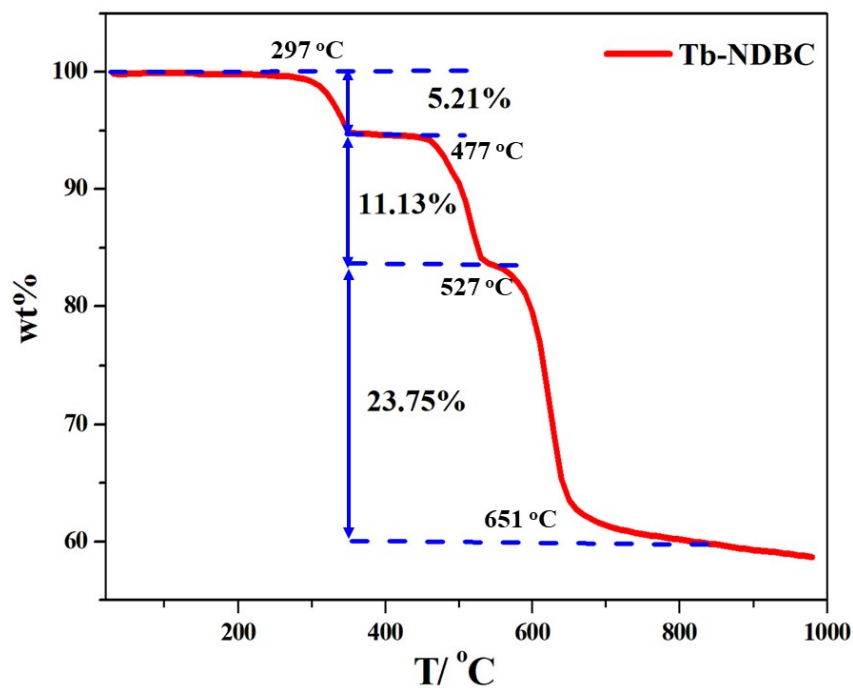

**Fig. S4.** The TG curve of Tb-NDBC.

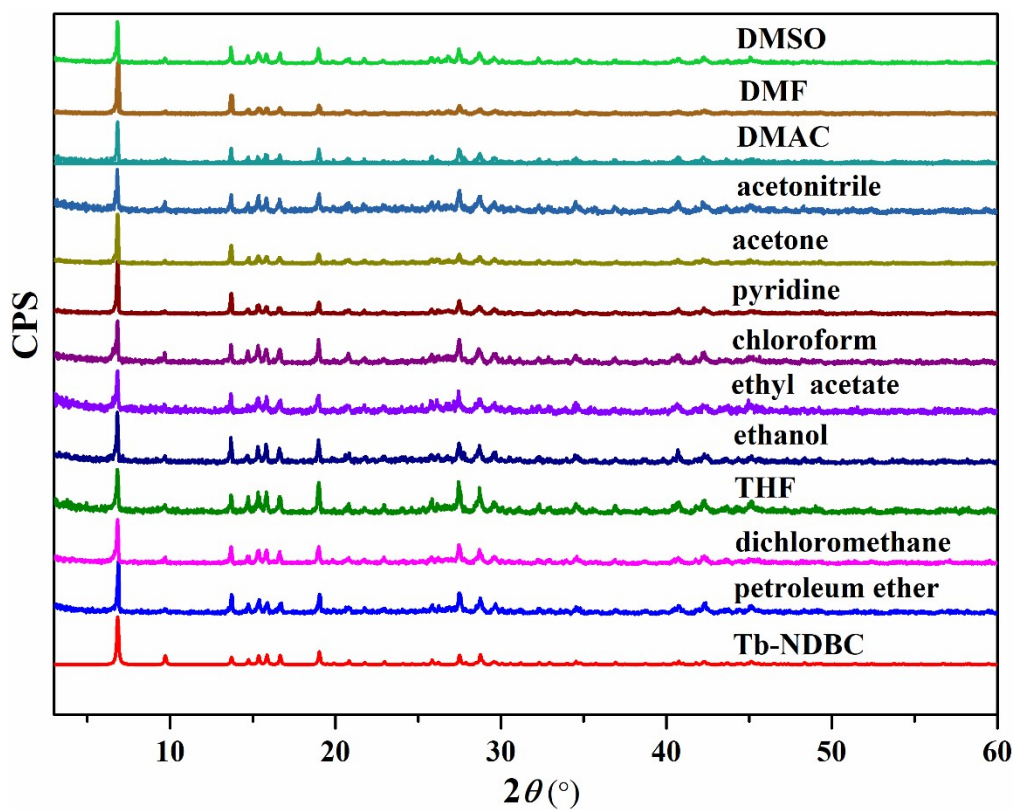

**Fig. S5.** Experimental PXRD patterns of Tb-NDBC immersed in twelve organic solvents for 48 h compared to the one of Tb-NDBC.

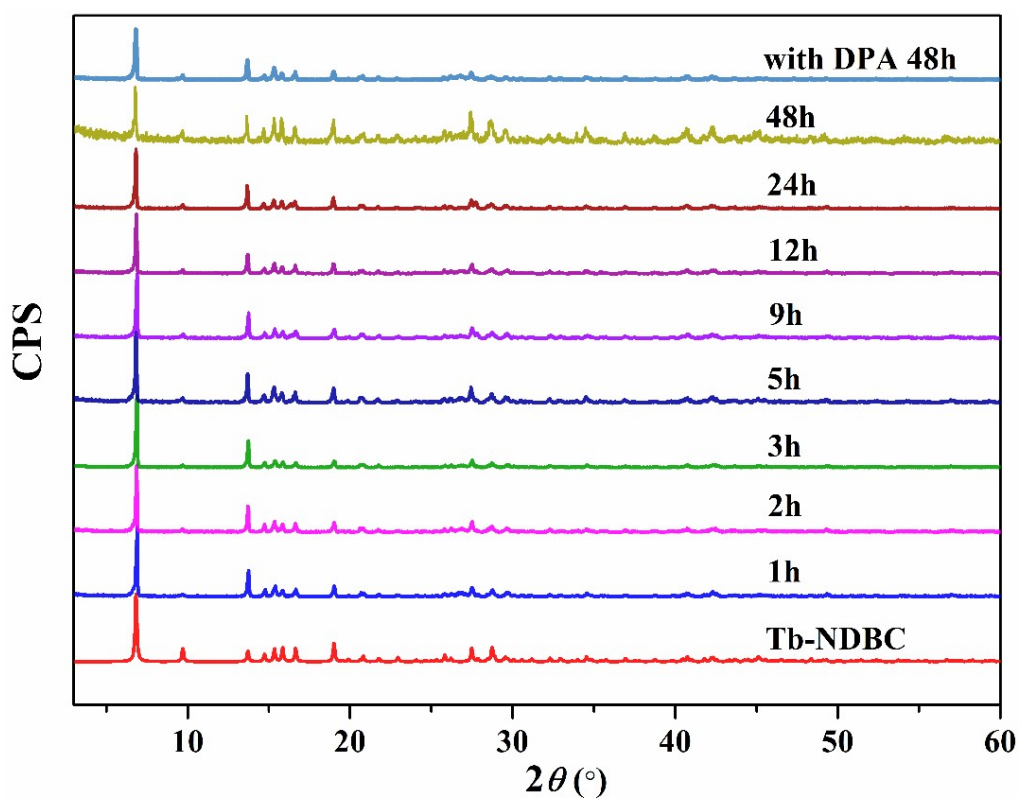

**Fig. S6.** Experimental PXRD patterns of Tb-NDBC immersed in water for 1-48 h compared to the one of Tb-NDBC.

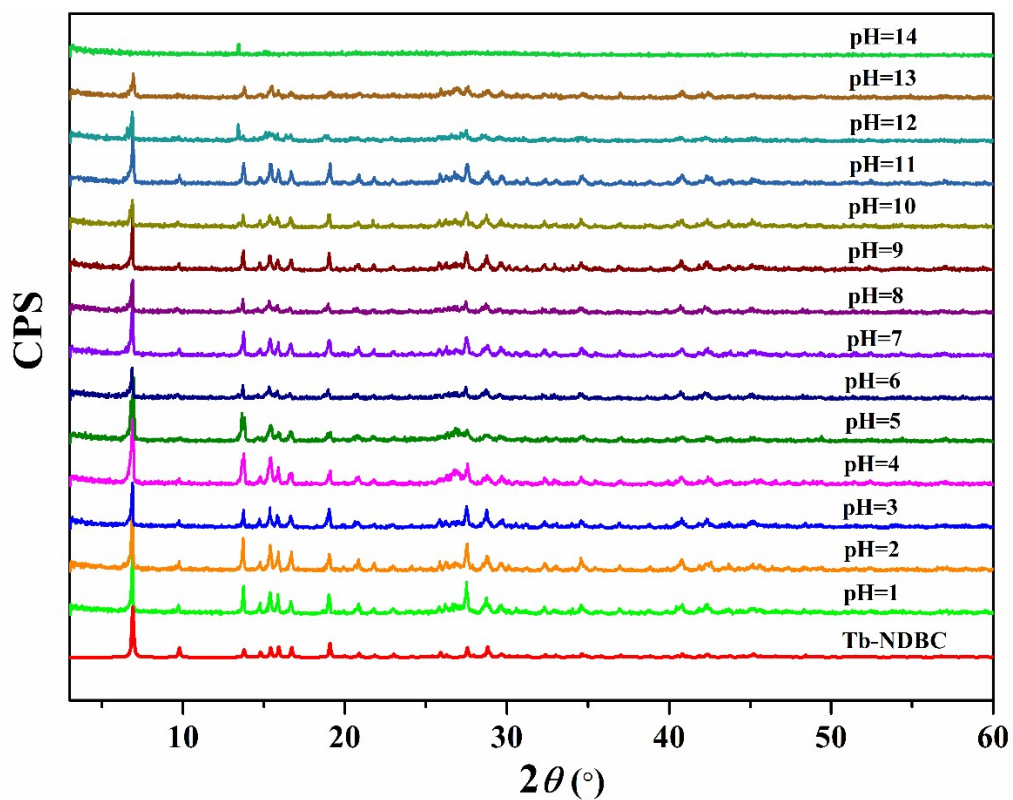

**Fig. S7.** Experimental PXRD patterns of Tb-NDBC immersed in HCl or NaOH aqueous solutions for 48h with pH =1-14 compared to the one of Tb-NDBC.

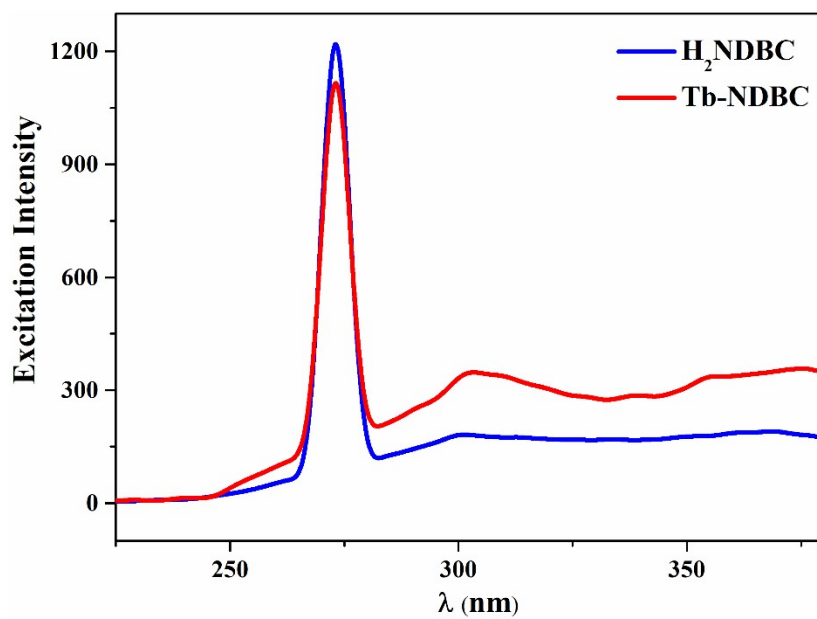

**Fig. S8.** Excitation spectra of Tb-NDBC and H<sub>2</sub>NDBC recorded at ambient temperature.

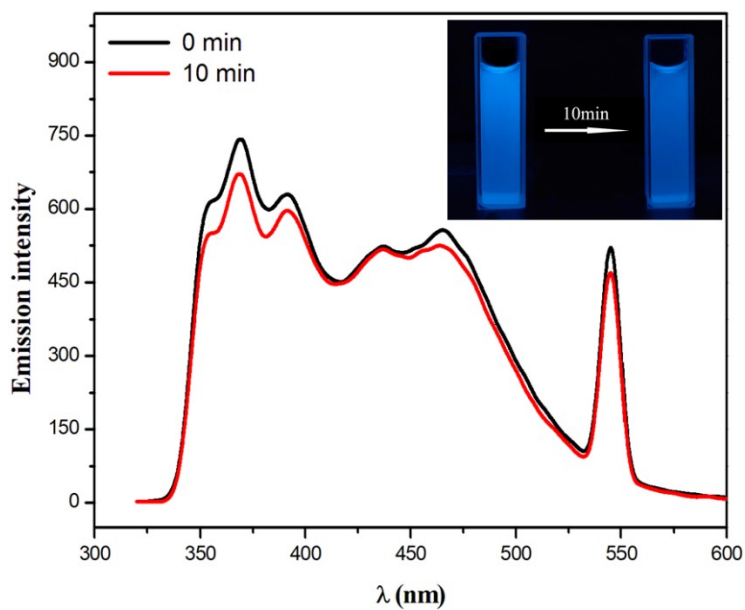

**Fig. S9.** Emission spectra of Tb-NDBC suspension with standing for 0 and 10min (inset: photo of cuvette taken under 365 nm UV light).

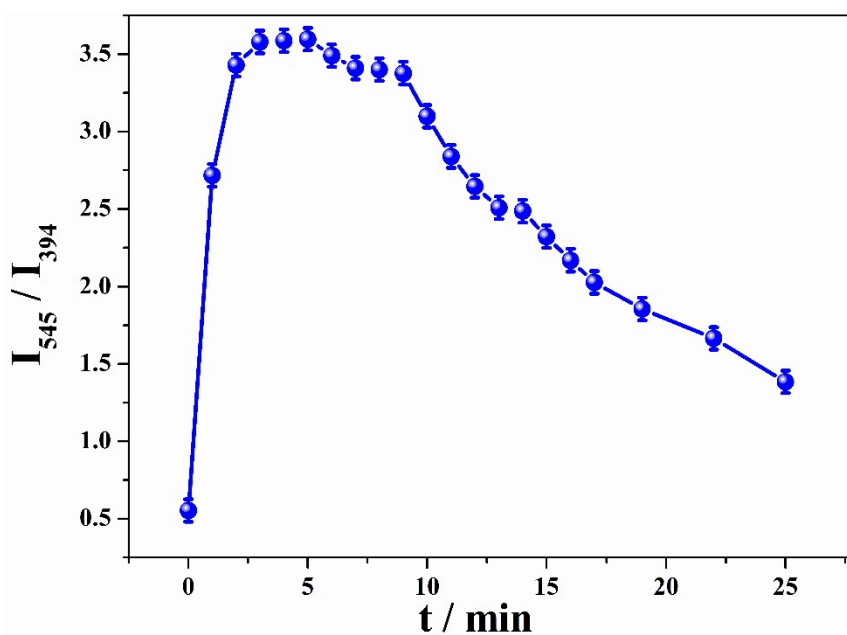

**Fig. S10.** The plot of  $I_{545}/I_{394}$  vs time of Tb-NDBC suspensions mixed with DPA with time ranging 0-25 min.



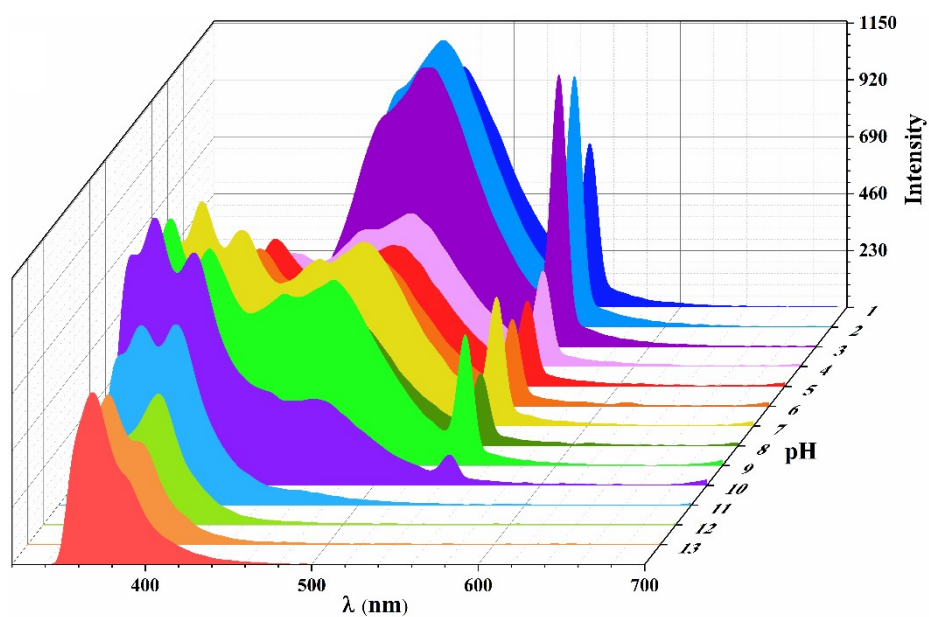

**Fig. S11.** The emission spectra of Tb-NDBC suspensions excited at 270 nm with pH ranging 1-14 without DPA added at ambient temperature.

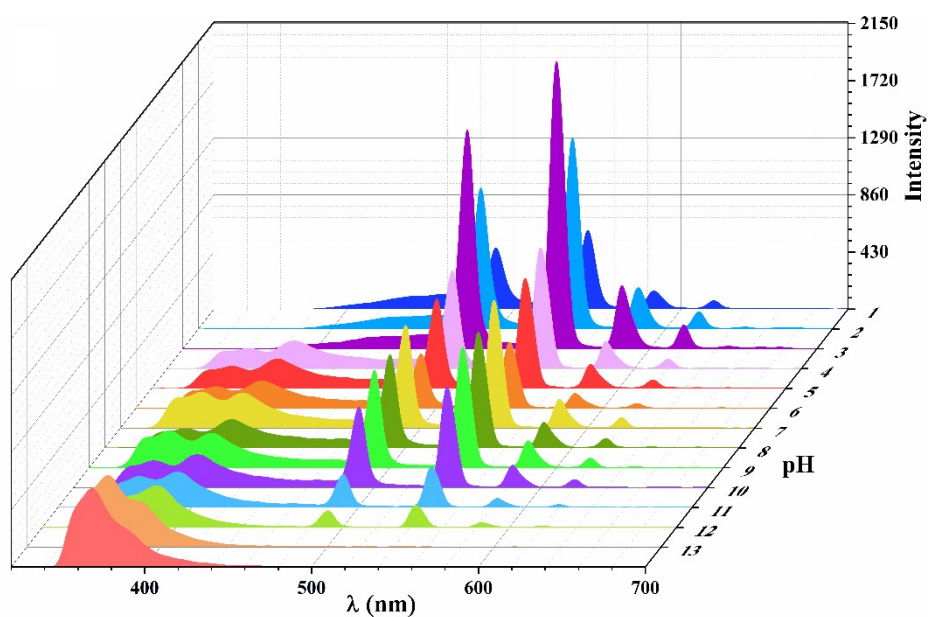

**Fig. S12.** The emission spectra of Tb-NDBC suspensions excited at 270 nm with pH ranging 1-14 with DPA added at ambient temperature.

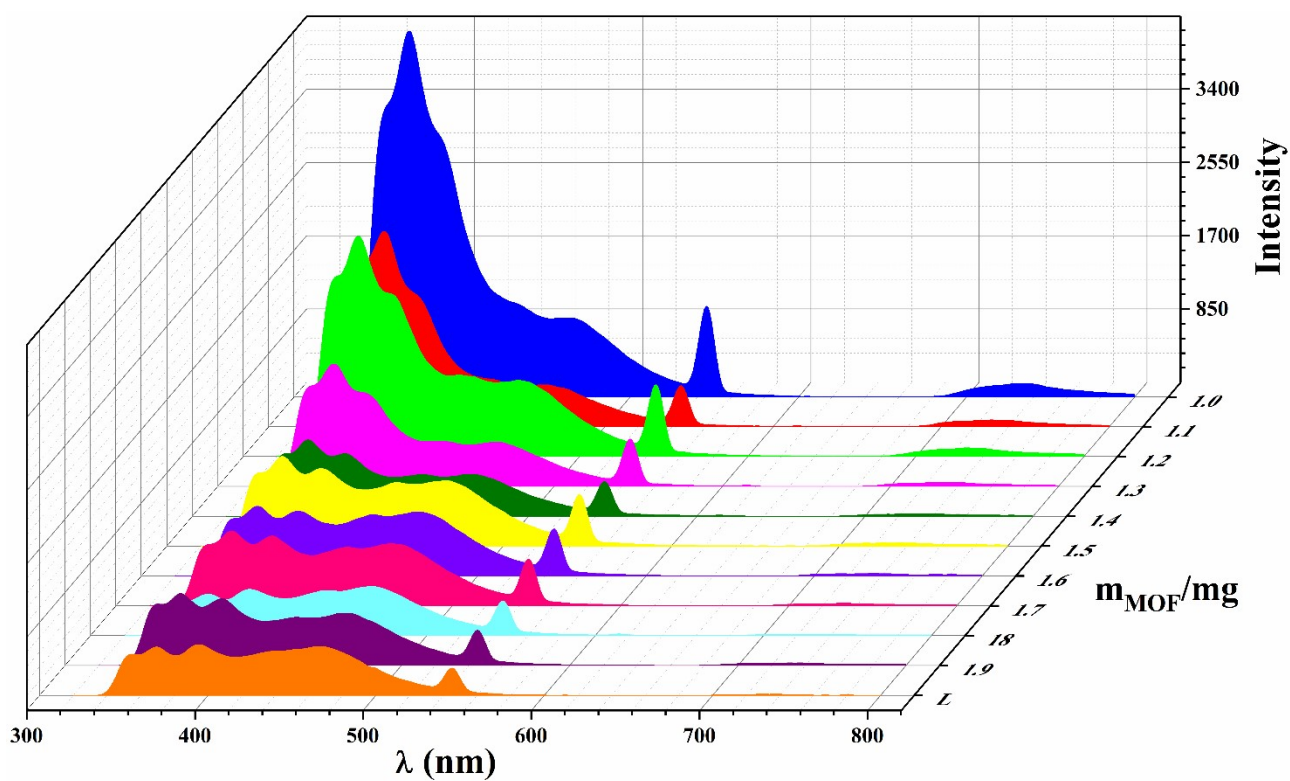

**Fig. S13.** The emission spectra of Tb-NDBC suspensions excited at 270 nm depending on the dosage of Tb-NDBC in 1-2 mg without DPA added at ambient temperature.

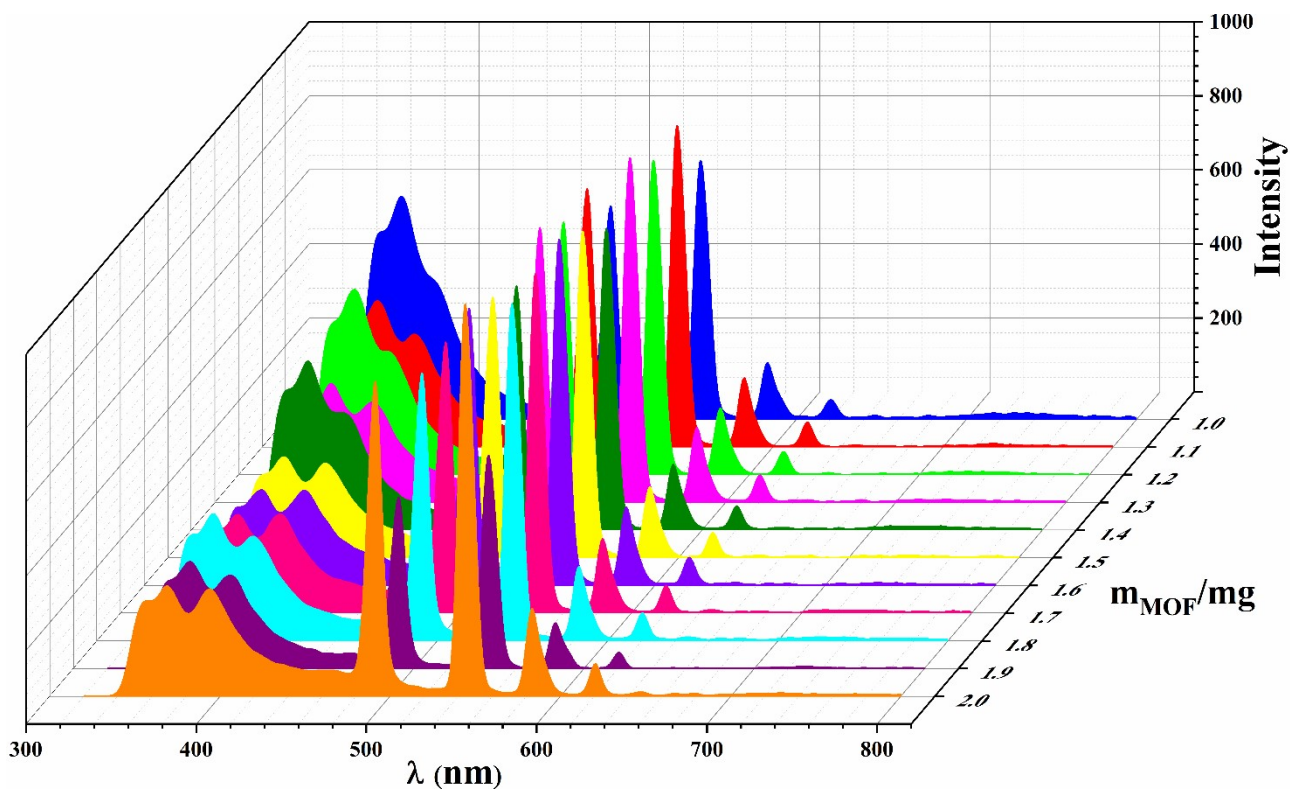

**Fig. S14.** The emission spectra of Tb-NDBC suspensions excited at 270 nm depending on the dosage of Tb-NDBC in 1-2 mg with DPA added at ambient temperature.



**Table S3.** Ten data of  $I_{545}/I_{394}$  for the blank sample

| No.               | 1     | 2     | 3     | 4     | 5     | 6     | 7     | 8     | 9     | 10    | SD<br>(n=10) |
|-------------------|-------|-------|-------|-------|-------|-------|-------|-------|-------|-------|--------------|
| $I_{394}$         | 621.1 | 549.5 | 556.8 | 559.8 | 569.2 | 568.5 | 578.7 | 757.3 | 585.4 | 589   |              |
| $I_{545}$         | 520.3 | 453.6 | 456.8 | 461.7 | 464.5 | 463.5 | 469.9 | 612.9 | 467   | 469   |              |
| $I_{545}/I_{394}$ | 0.838 | 0.825 | 0.820 | 0.825 | 0.816 | 0.815 | 0.812 | 0.809 | 0.798 | 0.796 | 0.01264      |

**Table S4.** Detection performance comparison of sensors to DPA detection

| Sensors                                                                                                           | Methods                       | Linear ranges      | LODs           | Refs      |
|-------------------------------------------------------------------------------------------------------------------|-------------------------------|--------------------|----------------|-----------|
| Tb-NDBC                                                                                                           | Fluorometric                  | 0-400 $\mu$ m      | 5.21 $\mu$ M   | This work |
| Tb <sub>0.875</sub> Eu <sub>0.125</sub> -Hddb                                                                     | Fluorometric                  | 0-100 $\mu$ M      | 0.8494 $\mu$ M | 1         |
| Eu <sub>0.1</sub> Tb <sub>0.9</sub> (NDBC)(H <sub>2</sub> O)Cl                                                    | Fluorometric                  | 0-600 $\mu$ M      | 0.248 $\mu$ M  | 2         |
| Eu <sub>0.1</sub> Tb <sub>0.9</sub> (BPDC)(H <sub>2</sub> O)Cl                                                    | Fluorometric                  | 0-400 $\mu$ M      | 0.874 $\mu$ M  | 2         |
| Eu <sub>0.1</sub> Tb <sub>0.9</sub> (BDC)(H <sub>2</sub> O)Cl                                                     | Fluorometric                  | 0-300 $\mu$ M      | 2.277 $\mu$ M  | 2         |
| Eu/Tb(BTC)                                                                                                        | Fluorometric                  | 0-1000 nM          | 1.087 $\mu$ M  | 3         |
| [Tb <sub>0.43</sub> Eu <sub>1.57</sub> (1,4-phda) <sub>3</sub> (H <sub>2</sub> O)](H <sub>2</sub> O) <sub>2</sub> | Fluorometric                  | 0-800 nM           | 0.17 $\mu$ M   | 4         |
| NH <sub>2</sub> -MOF-76(Eu);                                                                                      | Fluorometric                  | 0-100 $\mu$ M      | 3.8 $\mu$ M    | 5         |
| Tb <sup>3+</sup> /Eu <sup>3+</sup> @Ni-BTC                                                                        | Fluorometric                  | 0-20 $\mu$ M       | 14.7 nM        | 6         |
| RSPH@EuBTC                                                                                                        | Colorimetric,<br>Fluorometric | 0-140 $\mu$ M      | 2.2 $\mu$ M    | 7         |
| 1-Cu <sup>2+</sup>                                                                                                | Fluorometric,<br>Colorimetric | 0-10nm             | 2 $\mu$ M      | 8         |
| EDTA-Eu <sup>3+</sup>                                                                                             | Fluorometric                  | 10-50nm            | 10nM           | 9         |
| GMP-Tb/Eu                                                                                                         | Fluorometric                  | 2-16 $\mu$ M       | 96 nM          | 10        |
| His@ZIF-8/Tb <sup>3+</sup>                                                                                        | Fluorometric                  | 0.08-10 $\mu$ M    | 0.02 $\mu$ M   | 11        |
| TPE-TS@Eu/GMP ICP                                                                                                 | Colorimetric                  | 0-40 $\mu$ M       | 30, 27nm       | 12        |
| Pal@FL@UiO-66-(COOH) <sub>2</sub> -Eu                                                                             | Fluorometric                  | 0-35 $\mu$ M       | 9.3 nM         | 13        |
| TbP-CPs                                                                                                           | Fluorometric                  | 0-8.0 $\mu$ M      | 54nM           | 14        |
| Tb-COP                                                                                                            | Fluorometric                  | 0.1-30 $\mu$ M     | 13.5 nM        | 15        |
| R6H@Eu(BTC)                                                                                                       | Fluorometric                  | 0-80 $\mu$ M       | 4.5 $\mu$ M    | 16        |
| Atta-RhB@SiO <sub>2</sub> -EDTA-Tb                                                                                | Fluorometric                  | 0.1-40 $\mu$ M     | 9.8 nM         | 17        |
| RiP/Eu <sup>3+</sup> CPs                                                                                          | Fluorometric                  | 0-1 $\mu$ M        | 41.5 nM        | 18        |
| EBT-Eu <sup>3+</sup>                                                                                              | Fluorometric                  | 2-10 $\mu$ M       | 2 $\mu$ M      | 19        |
| Tb <sup>3+</sup> @UIO-67                                                                                          | Fluorometric                  | 0.3-6 $\mu$ M      | 36 nM          | 20        |
| UCNPs-TPP/EBT                                                                                                     | Colorimetric                  | 2-200 $\mu$ M      | 0.9 $\mu$ M    | 21        |
| Eu@SiNPs                                                                                                          | Fluorometric                  | 4-20 $\mu$ M       | 0.15 $\mu$ M   | 22        |
| pSiNPs-Tb                                                                                                         | Fluorometric                  | 1-10 $\mu$ M       | 1.25 $\mu$ M   | 23        |
| Fe <sub>3</sub> O <sub>4</sub> -Tb NP                                                                             | Fluorometric                  | 20-1000nM          | 5.4 nM         | 24        |
| HAP-NPs                                                                                                           | Fluorometric                  | 0.1-40 $\mu$ M     | 77 nM          | 25        |
| AuNPs                                                                                                             | SERS                          | 0.5-4 $\mu$ M      | 5 fM           | 26        |
| Si NPs/Tb-MOFs                                                                                                    | Fluorometric                  | 0.025-3 $\mu$ M    | 5.3 nM         | 27        |
| CD-Cu(II)                                                                                                         | Fluorometric                  | 0.25-20 $\mu$ M    | 12 nM          | 28        |
| CdS@ZIF-8                                                                                                         | Fluorometric                  | 0.1-150 $\mu$ M    | 67 nM          | 29        |
| CDs-Tb                                                                                                            | Fluorometric                  | 0.0005-2.5 $\mu$ M | 0.1 nM         | 30        |
| OG-CDs                                                                                                            | Fluorometric                  | 0.5-12.5 $\mu$ M   | 56 nM          | 31        |
| Eu-CDs                                                                                                            | Fluorometric                  | 5-700nM            | 5nM            | 32        |
| FMn-CDs                                                                                                           | Fluorometric                  | 0.1-750nM          | 0.1 nM         | 33        |
| CDs-Eu                                                                                                            | Fluorometric                  | 0.5nM-5 $\mu$ M    | 0.8 nM         | 34        |
| hPEI-CD-EDTA-Eu <sup>3+</sup>                                                                                     | Fluorometric                  | 1.0-100nM,         | 190 pM         | 35        |
| EBT-CDs@Eu                                                                                                        | Fluorometric                  | 0.1-12.0 $\mu$ M   | 10.64 nM       | 36        |
| CdS QDs -Eu <sup>3+</sup>                                                                                         | Fluorometric                  | 1-120 $\mu$ M      | 0.2 $\mu$ M    | 37        |
| BCNO QDs-EDTA-Eu <sup>3+</sup>                                                                                    | Fluorometric                  | 0-700nM            | 0.5 nM         | 38        |
| SiQDs-NH <sub>2</sub> -EDTA-Eu                                                                                    | Fluorometric                  | 0-34 $\mu$ M       | 1.02 $\mu$ M   | 39        |
| Au@GSH NC-Cu <sup>2+</sup>                                                                                        | Fluorometric                  | 1-4 $\mu$ M        | 19nM           | 40        |
| Sm <sup>3+</sup> /Au(0)@Au(I)-SG NCs                                                                              | Fluorometric                  | 1-120 $\mu$ M      | 0.1 $\mu$ M    | 41        |
| BSA-Au NCs                                                                                                        | Fluorometric                  | 0-66.7 $\mu$ M     | 35.8 nM        | 42        |

Note: H<sub>4</sub>ddb=1,3-di(3',5'-dicarboxylphenyl)benzene; BPDC<sup>2-</sup>=4,4'-biphenyldicarboxylate; BDC<sup>2-</sup>=1,4-benzenedicarboxylate; BTC<sup>3-</sup>= 1,3,5-benzenetricarboxylate; 1,4-phda=1,4-phenylenediacetic acid; 1=atechol-substituted monostyryl boradiazaindacene probe; EDTA=ethylenediaminetetraacetic acid dianhydride; GMP=guanine 5'-monophosphate; R6H=rhodamine-based sensing probe; monophosphate; His=L-histidine; ZIF=zeolitic imidazolate framework; TPE-TS=tetra(4-sulfophenyl)ethylene; ICP=Infinite

coordination polymer; Pal@FL=Pal-doped fluorescein; RSPH=rhodamine; TbP=terbium; CPs=coordination polymer microspheres; COP=covalent organic polymer; Atta=attapulgate; RhB= Rhodamine B; RiP = riboflavin-50-phosphate; EBT=eriochrome Black T; UCNPs=upconversion nanoparticles; TPP=tripolyphosphate; pSiNPs=porous silicon nanoparticles; HAP=hydroxyapatite; CD=carbon dot; OG=orange/green dual-emissive; FMn=functionalized manganese-doped; hPEI=hyperbranched polyethyleneimine; QDs= quantum dots; BCNO =boron carbon oxynitride; GSH=glutathione; NCs=nanoclusters; SG =glutathione; BSA=bovine serum albumin; phosphonate.

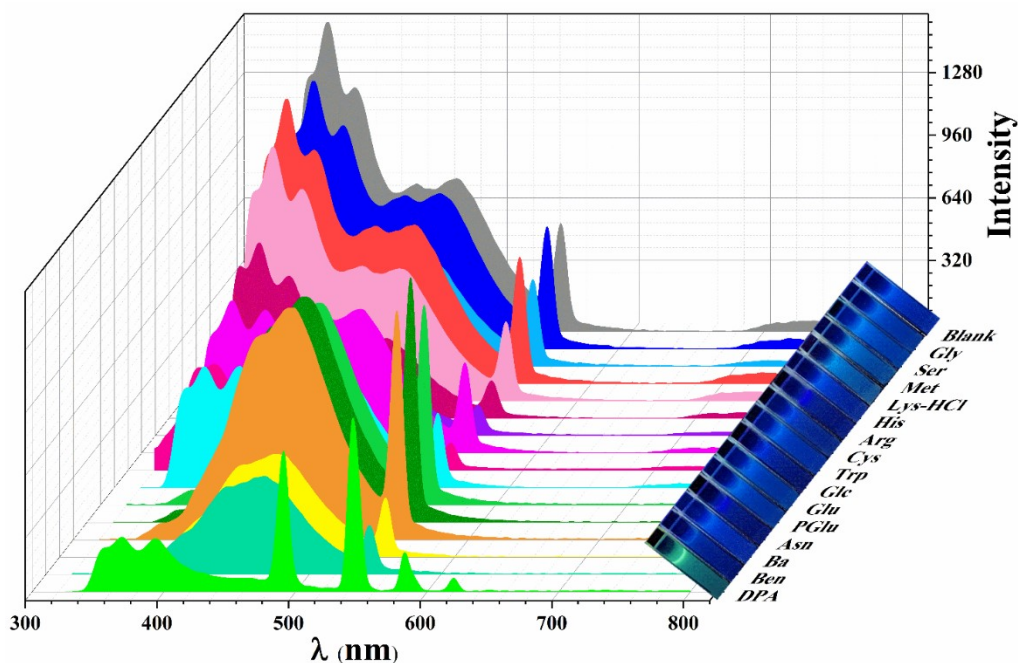

**Fig. S15.** The emission spectra of 1.8 mg Tb-NDBC suspensions excited at 270 nm with fourteen kinds of 1 mM interferents with photos taken under 365 nm UV light.

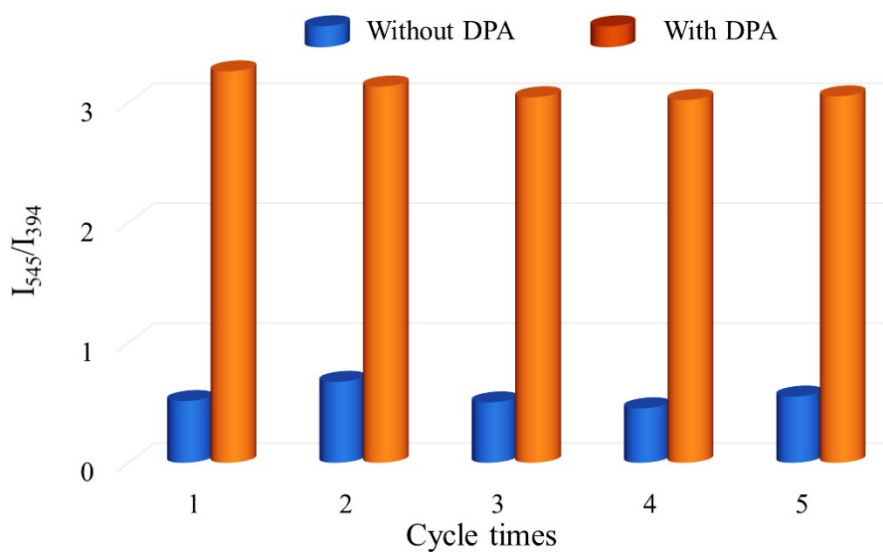

**Fig. 16.** The durability of Tb-NDBC in five DPA detections.

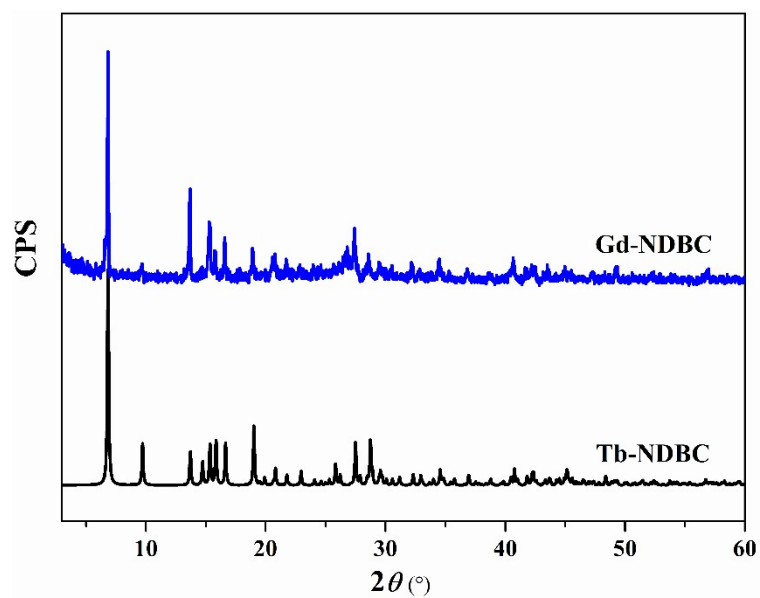

**Fig. S17.** The PXRD pattern of Gd-NDBC comparing to Tb-NDBC.

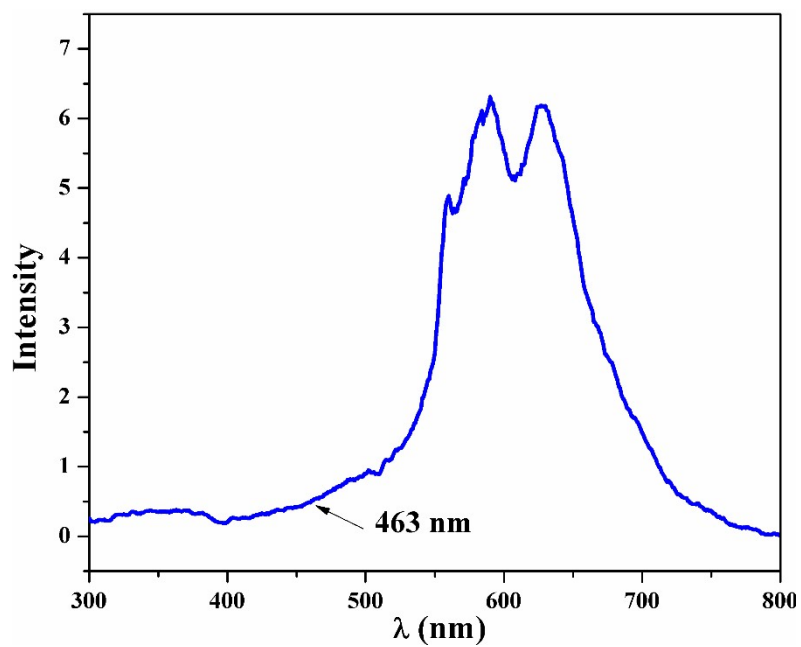

**Fig. S18.** Phosphorescence spectrum of Gd-NDBC under 340 nm excitation at 77K.

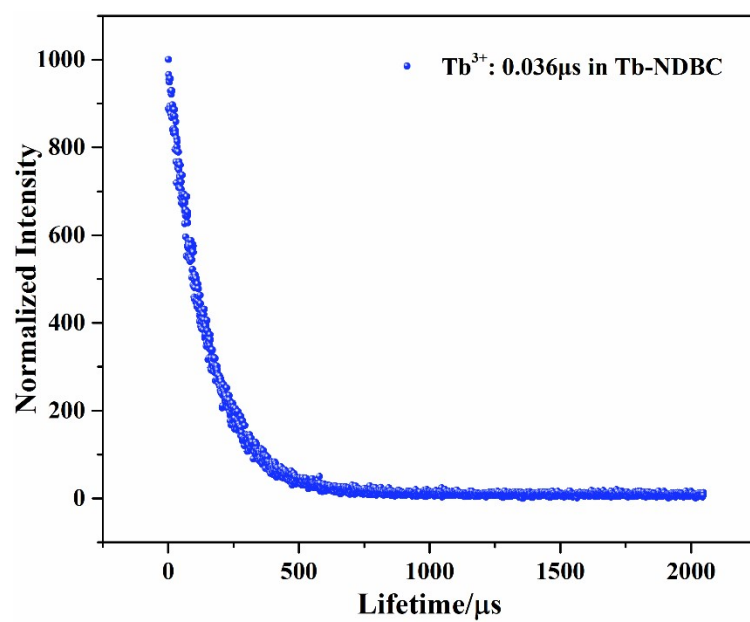

Fig. S19. The fluorescence lifetime of Tb<sup>3+</sup> in Tb-NDC without DPA.

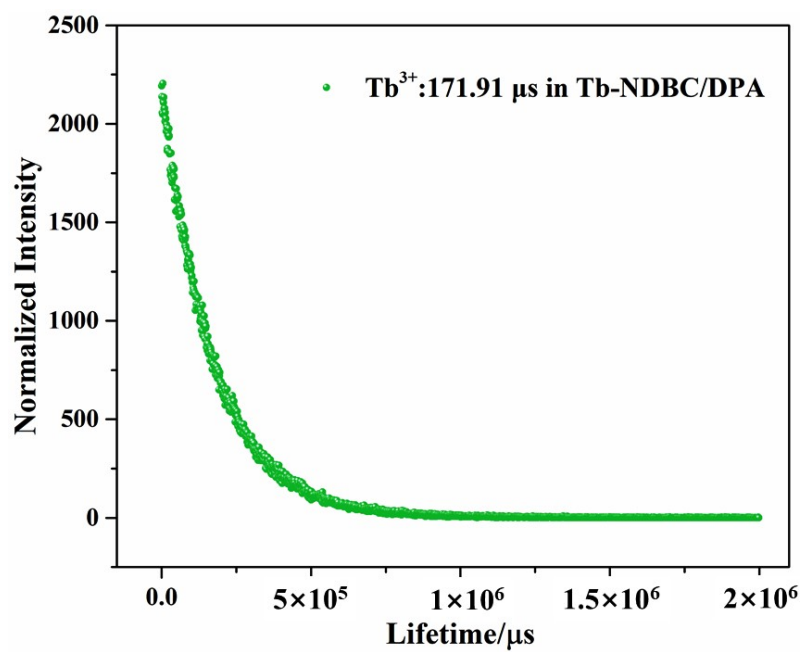

Fig. S20. The fluorescence lifetime of Tb<sup>3+</sup> in Tb-NDC with DPA.

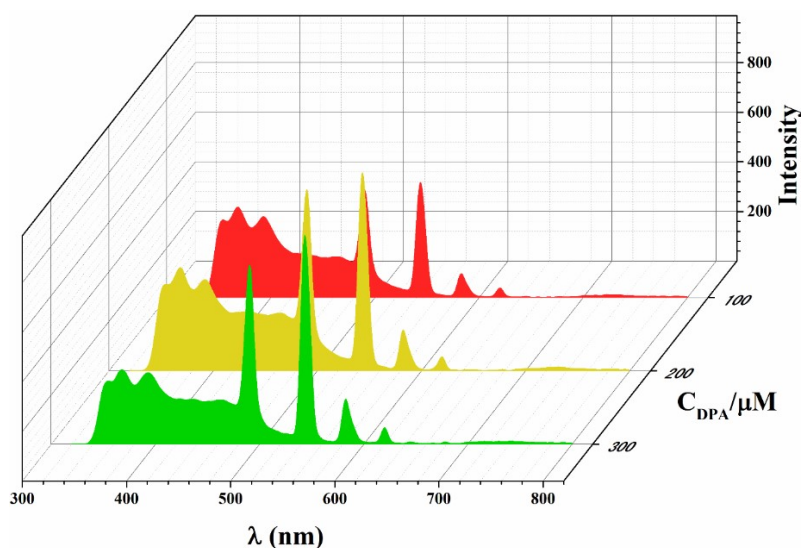

**Fig. 21.** The emission spectra of Tb-NDBC suspensions in human serum with  $C_{DPA} = 100, 200$  and  $300 \mu\text{M}$  excited at  $270 \text{ nm}$  at ambient temperature.

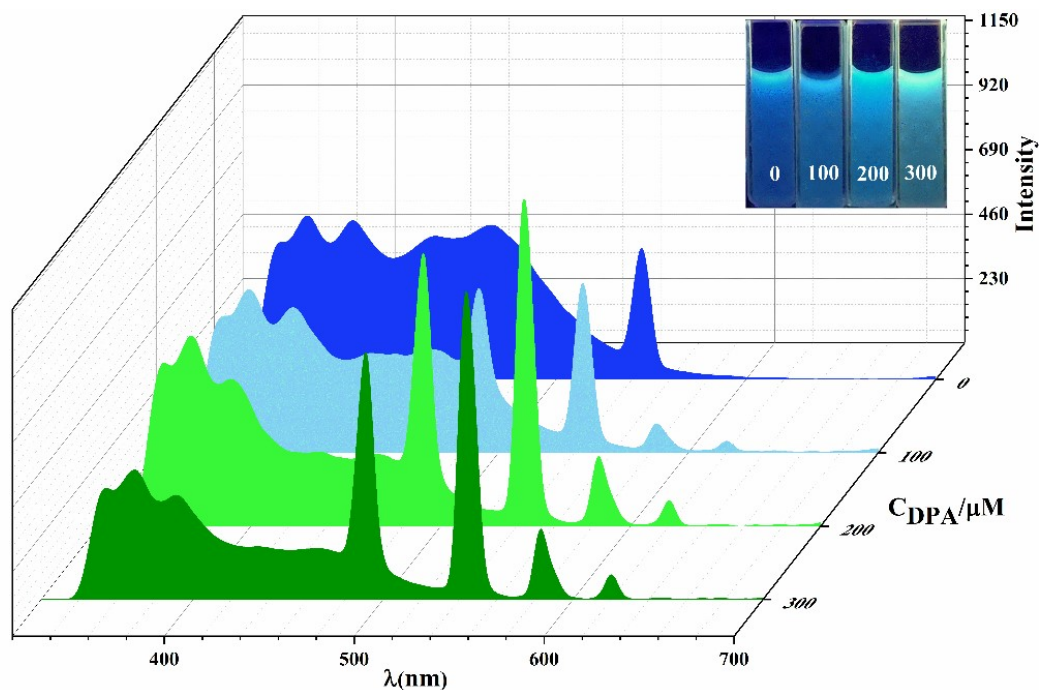

**Fig. 22.** The emission spectra of Tb-NDBC suspensions in lake water with  $C_{DPA} = 100, 200$  and  $300 \mu\text{M}$  excited at  $270 \text{ nm}$  at ambient temperature with photos taken under  $365 \text{ nm}$  UV light.

1. X. B. Chen, C. X. Qi, Y. B. Xu, H. Li, L. Xu and B. Liu, *J. Mater. Chem. C*, 2020, **8**, 17325.
2. M. L. Shen, B. Liu, L. Xu and H. Jiao, *J. Mater. Chem. C*, 2020, **8**, 4392.
3. M. N. Wu, Y. X. Zhuang, J. B. Liu, W. W. Chen, X. Y. Li and R. J. Xie, *Opt. Mater.*, 2020, **106**, 110006.
4. J. Othong, J. Boonmak, F. Kielar, S. Hadsadee, S. Jungsuttiwong and S. Youngme, *Sensor. Actuat B-Chem.*, 2020, **316**, 128156.
5. D. Wu, Z. Zhang, X. W. Chen, L. K. Meng, C. G. Li, G. H. Li, X. B. Chen, Z. Shi and S. H. Feng, *Chem. Commun.*, 2019, **55**, 14918.
6. H. Lei, C. X. Qi, X. B. Chen, T. Zhang, L. Xu and B. Liu, *New J. Chem.*, 2019, **43**, 18259.



- 
7. X. M. Li, J. Y. Zhao, Y. Y. Zhu, B. L. Wang, X. F. Wei, Y. Y. Shao, Y. S. Ma and T. Y. Jiang, *Spectrochim. Acta A.*, 2020, **229**, 117999.
  8. Y. Cetinkaya, M.N.Z. Yurt, H. Avni Oktem and M.D. Yilmaz, *J. Hazard. Mater.*, 2019, **377**, 299.
  9. M. Donmez, H.A. Oktem and M.D. Yilmaz, *Carbohydr. Polym.*, 2018, **180**, 226
  10. N. Gao, Y. F. Zhang, P. C. Huang, Z. H. Xiang, F. Y. Wu and L. Q. Mao, *Anal. Chem.*, 2018, **90**, 7004.
  11. L. Guo, M. Liang, X. Wang, R. Kong, G. Chen, L. Xia and F. Qu, *Chem. Sci.*, 2020, **11**, 2407.
  12. C. Huang, R. Ma, Y. Luo, G. Shi, J. Deng and T. Zhou, *Anal. Chem.*, 2020, **92**, 12934.
  13. L. Jia, X. Chen, J. Xu, L. Zhang, S. Guo, N. Bi and T. Zhu, *J. Hazard. Mater.*, 2021, **402**, 123776.
  14. Y. Luo, L. Zhang, L. Zhang, B. Yu, Y. Wang and W. Zhang, *ACS Appl. Mater. Interfaces*, 2019, **11**, 15998.
  15. S. Qu, N. Song, G. Xu and Q. Jia, *Sensors Actuat. B-Chem.*, 2019, **290**, 9.
  16. J. B. Dunn, M. L. Burns, S. E. hunter and P. E. Savage, *J. Supercrit. Fluid.*, 2003, **27**, 263.
  17. J. Xu, X. Shen, L. Jia, C. Zhang, T. Ma, T. Zhou, T. Zhu, Z. Xu, J. Cao, B. Liu, N. Bi, L. Liu and Y. Li, *Dyes Pigments*, 2018, **148**, 44.
  18. S. F. Xue, J. F. Zhang, Z. H. Chen, X. Y. Han, M. Zhang and G. Shi, *Anal. Chim. Acta*, 2018, **1012**, 74.
  19. M. D. Yilmaz and H.A. Oktem, *Anal. Chem.*, 2018, **90**, 4221.
  20. X. Zhang, W. Zhang, G. Li, Q. Liu, Y. Xu and X. Liu, *Mikrochim. Acta*, 2020, **187**, 122.
  21. Z. H. Cheng, X. Liu, S. Q. Zhang, T. Yang, M. L. Chen and J. H. Wang, *Anal. Chem.*, 2019, **91**, 12094
  22. M. Na, S. Zhang, J. Liu, S. Ma, Y. Han, Y. Wang, Y. He, H. Chen and X. Chen, *J. Hazard. Mater.*, 2020, **386**, 121956.
  23. Y. Jung, S. Kang, J. An, J. Jung and D. Kim, *Dyes Pigments*, 2020, **182**, 108700.
  24. T. M. Koo, M. J. Ko, B. C. Park, M. S. Kim and Y. K. Kim, *J. Hazard. Mater.*, 2021, **408**, 124870.
  25. Y. Li, X. Li, D. Wang, C. Shen and M. Yang, *Mikrochim. Acta*, 2018, **185**, 435.
  26. T. K. Naqvi, A. Bajpai, M. S. S. Bharati, M. M. Kulkarni, A. M. Siddiqui, V. R. Soma, P. K. Dwivedi, *J. Hazard. Mater.*, 2021, **407**, 124353.
  27. D. Yang, S. Mei, Z. Wen, X. Wei, Z. Cui, B. Yang, C. Wei, Y. Qiu, M. Li, H. Li, W. Zhang, F. Xie, L. Wang and R. Guo, *Mikrochim. Acta*, 2020, **187**, 666.
  28. P. Li, A. N. Ang, H. Feng and S. F. Y. Li, *J. Mater. Chem. C*, 2017, **5**, 6962
  29. X. Li, J. Luo, L. Deng, F. Ma and M. Yang, *Anal. Chem.*, 2020, **92**, 7114.
  30. M. L. Liu, B. B. Chen, J. H. He, C. M. Li, Y. F. Li and C. Z. Huang, *Talanta*, 2019, **191**, 443.
  31. L. F. Pang, H. Wu, M. X. Wei, X. F. Guo and H. Wang, *Spectrochim. Acta A Mol. Biomol. Spectrosc.*, 2021, **244**, 118872.
  32. M. Rong, X. Deng, S. Chi, L. Huang, Y. Zhou, Y. Shen and X. Chen, *Mikrochim. Acta*, 2018, **185**, 201.
  33. M. Rong, Y. Liang, D. Zhao, B. Chen, C. Pan, X. Deng, Y. Chen and J. He, *Sensors Actuat. B-Chem.*, 2018, **265**, 498.
  34. J. Wang, D. Li, Y. Qiu, X. Liu, L. Huang, H. Wen and J. Hu, *Talanta*, 2020, **220**, 121377.
  35. H. Yang, F. Lu, X. Zhan, M. Tian, Z. Yuan and C. Lu, *Talanta*, 2020, **208**, 120368.
  36. Q. Zhou, Y. Fang, J. Li, D. Hong, P. Zhu, S. Chen, K. Tan, *Talanta*, 2021, **222**, 121548.
  37. X. Li, L. Deng, F. Ma and M. Yang, *Mikrochim. Acta*, 2020, **187**, 287.
  38. M. Rong, X. Yang, L. Huang, S. Chi, Y. Zhou, Y. Shen, B. Chen, X. Deng and Z. Q. Liu, *ACS Appl. Mater. Interfaces*, 2019, **11**, 2336.
  39. Z. Zhou, J. Gu, Y. Chen, X. Zhang, H. Wu and X. Qiao, *Spectrochim. Acta A Mol. Biomol. Spectrosc.*, 2019, **212**, 88.
  40. M. M. F. Baig and Y. C. Chen, *Analyst*, 2019, **144**, 3289.
  41. M. I. Halawa, B. S. Li and G. Xu, *ACS Appl. Mater. Interfaces*, 2020, **12**, 32888.

---

42. X. Liu, Y. Qiu, B. Li, Z. Li, Y. Zhang, J. Wang and Q. Xiong, *Spectrochim. Acta A Mol. Biomol. Spectrosc.*, 2020, **240**, 118541.
